# Supplementary material for: Occupational endotoxin exposure in association with atopic sensitization and respiratory health in adults: Results of a 5-year follow-up
Source: PLOS journal article supplement (doi:10.1371/journal.pone.0189097), 2017-12-06
Supplement: S3 (10.1371/journal.pone.0189097.s003) [file journal.pone.0189097.s003]

## Exposure estimates using baseline model and pooled model by industry and job title

Baseline exposure model is based on baseline measurements only, pooled model is based on all measurements from both time points. The pooled model is used to assign exposure to participants in the current study population.

| Sector                      | Jobtitle       | Baseline model |                                 | Pooled model |                                 |
|-----------------------------|----------------|----------------|---------------------------------|--------------|---------------------------------|
|                             |                | n              | Endotoxin [EU.m <sup>-3</sup> ] | n            | Endotoxin [EU.m <sup>-3</sup> ] |
| <b>Flower bulb</b>          |                |                |                                 |              |                                 |
|                             | Office         | 3              | 14                              | 8            | 13                              |
|                             | Liftruck       | 2              | 86                              | 3            | 206                             |
|                             | Technician     | 2              | 93                              | 3            | 103                             |
|                             | Packer         | 9              | 169                             | 9            | 182                             |
|                             | Crop grower    | 1              | 181                             | 2            | 581                             |
|                             | Operator       | 14             | 720                             | 28           | 443                             |
| <b>Animal feed</b>          |                |                |                                 |              |                                 |
|                             | Office         | 6              | 35                              | 8            | 32                              |
|                             | Lab            | 4              | 59                              | 4            | 59                              |
|                             | Truckdriver    | 10             | 251                             | 10           | 251                             |
|                             | Controlroom    | 19             | 289                             | 28           | 220                             |
|                             | Operator       | 27             | 335                             | 33           | 343                             |
|                             | Technician     | 7              | 416                             | 9            | 407                             |
|                             | Cleaner        | 3              | 946                             | 3            | 966                             |
|                             | Crane driver   | 5              | 1086                            | 5            | 1045                            |
|                             | Unloader ships | 5              | 10645                           | 5            | 10305                           |
|                             | Liftruck       |                |                                 | 2            | 674                             |
|                             | Packer         |                |                                 | 2            | 1444                            |
| <b>Onions (modernized)</b>  |                |                |                                 |              |                                 |
|                             | Technician     |                |                                 | 1            | 9006                            |
|                             | Office         | 3              | 381                             | 7            | 336                             |
|                             | Packer         | 1              | 754                             | 1            | 625                             |
|                             | Liftruck       | 2              | 775                             | 6            | 846                             |
|                             | Operator       | 6              | 1453                            | 8            | 1747                            |
| <b>Onions (traditional)</b> |                |                |                                 |              |                                 |
|                             | Technician     | 2              | 801                             | 3            | 1175                            |
|                             | Packer         | 4              | 4906                            | 7            | 6474                            |
|                             | Liftruck       | 6              | 5045                            | 9            | 4131                            |
|                             | Operator       | 15             | 9454                            | 26           | 7764                            |
| <b>Seeds</b>                |                |                |                                 |              |                                 |
|                             | Lab            | 2              | 22                              | 6            | 23                              |
|                             | Packer         | 2              | 25                              | 2            | 20                              |
|                             | Crop grower    | 2              | 36                              | 4            | 35                              |
|                             | Operator       | 5              | 406                             | 12           | 279                             |
| <b>Farmer</b>               |                |                |                                 |              |                                 |
|                             | Crop           | 30             | 63                              | 40           | 74                              |
|                             | Livestock      | 46             | 219                             | 71           | 246                             |
|                             | Swine          | 6              | 3395                            | 11           | 2876                            |
